# Supplementary material for: Real‐World Nonmotor Changes in Patients with Parkinson's Disease and Motor Fluctuations: J‐FIRST
Source: PubMed Central journal article supplement (PMC7197319; doi:10.1002/mdc3.12939), 2020-04-11
Supplement: MDC3-7-431-s001.pdf [file MDC3-7-431-s001.pdf]

# Supplementary Figure S1.

A)

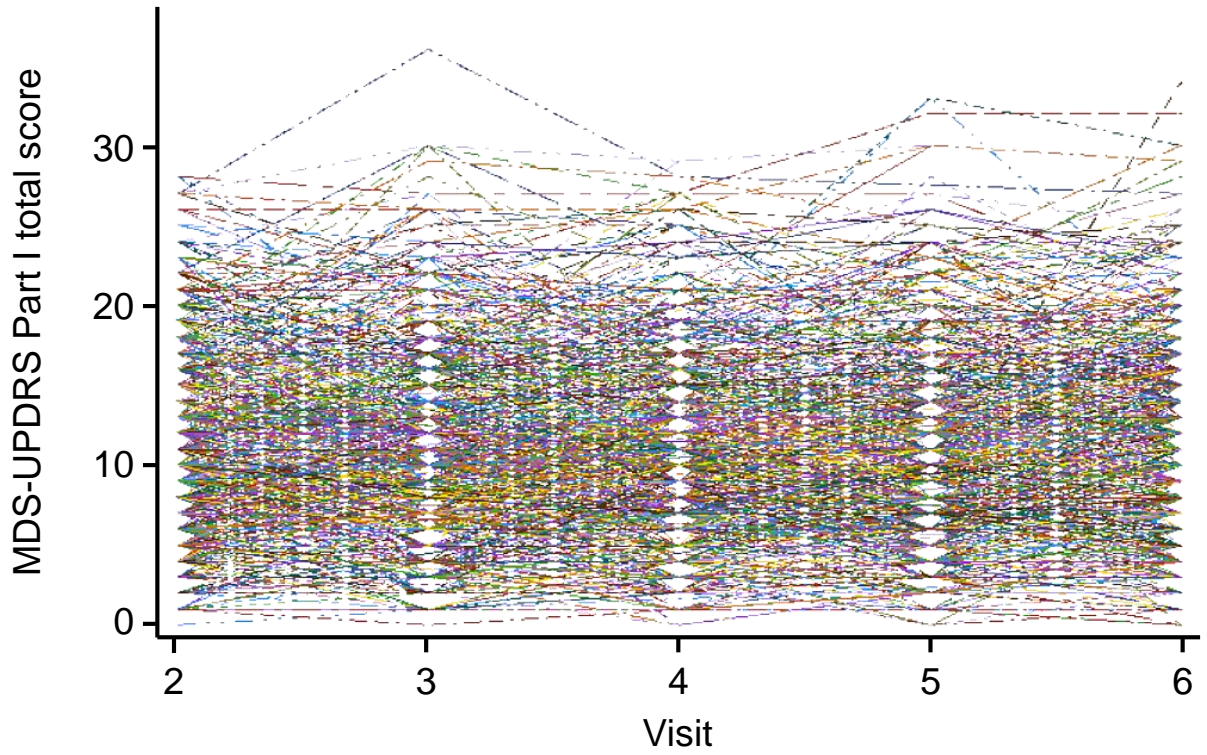

MDS-UPDRS, Movement Disorder Society Unified  
Parkinson's Disease Rating Scale

# Supplementary Figure S1.

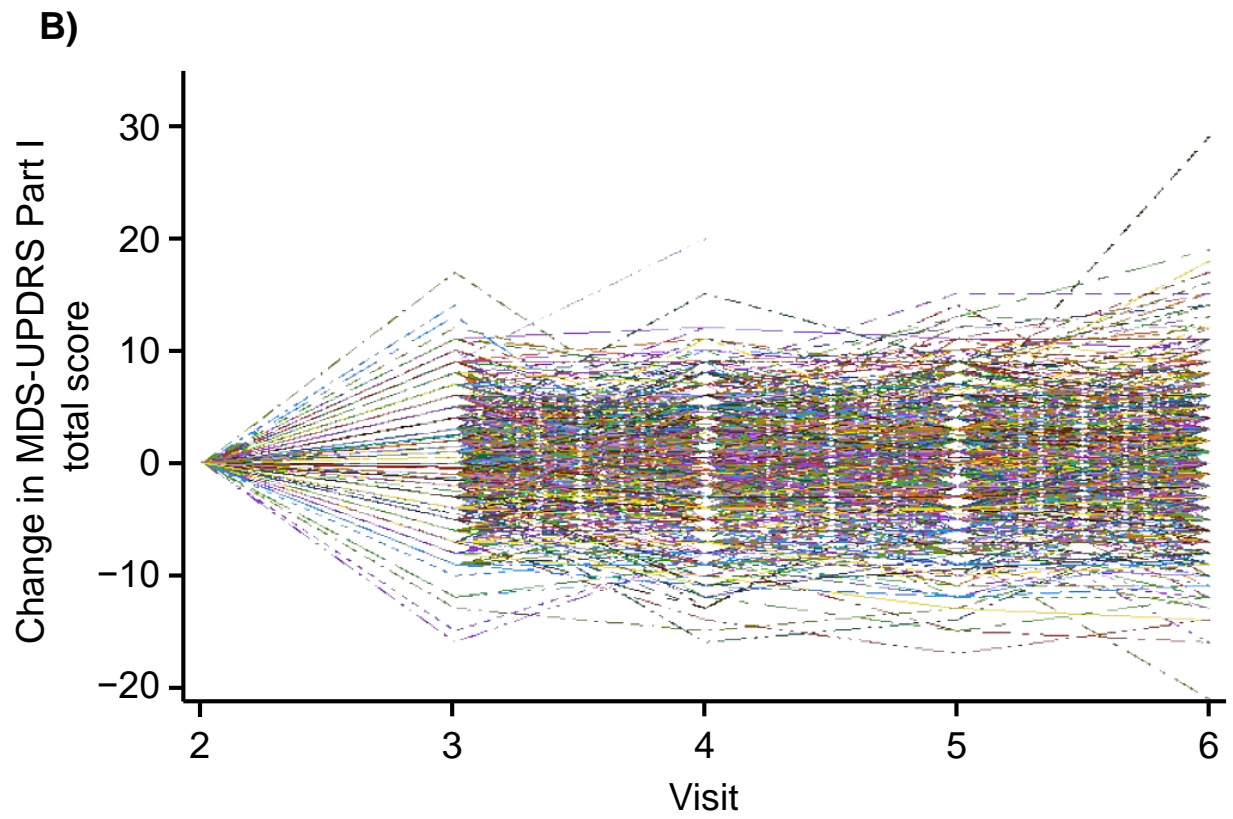

MDS-UPDRS, Movement Disorder Society Unified  
Parkinson's Disease Rating Scale

# Supplementary Figure S2.

## A) Unchanged

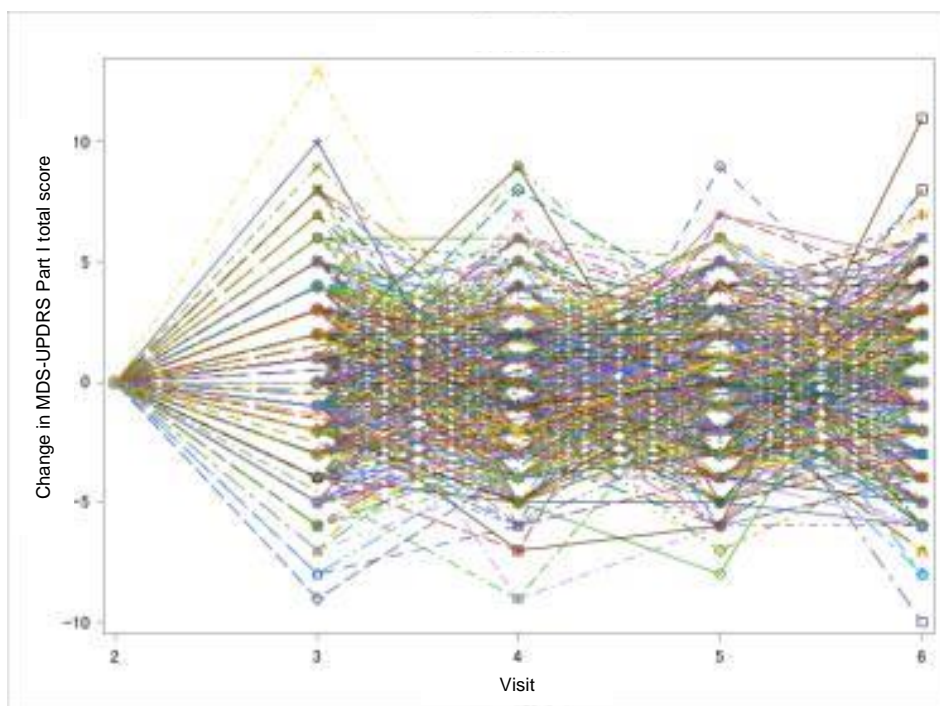

NMS, non-motor symptoms

# Supplementary Figure S2.

## B) Deteriorated

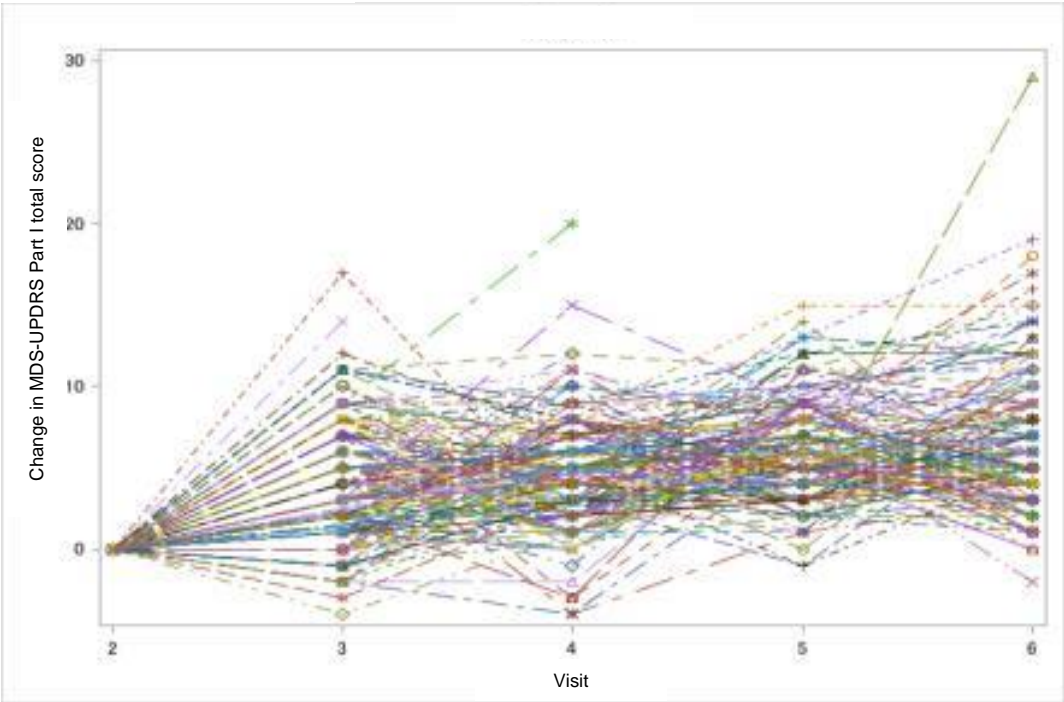

NMS, non-motor symptoms

# Supplementary Figure S2.

## C) Improved

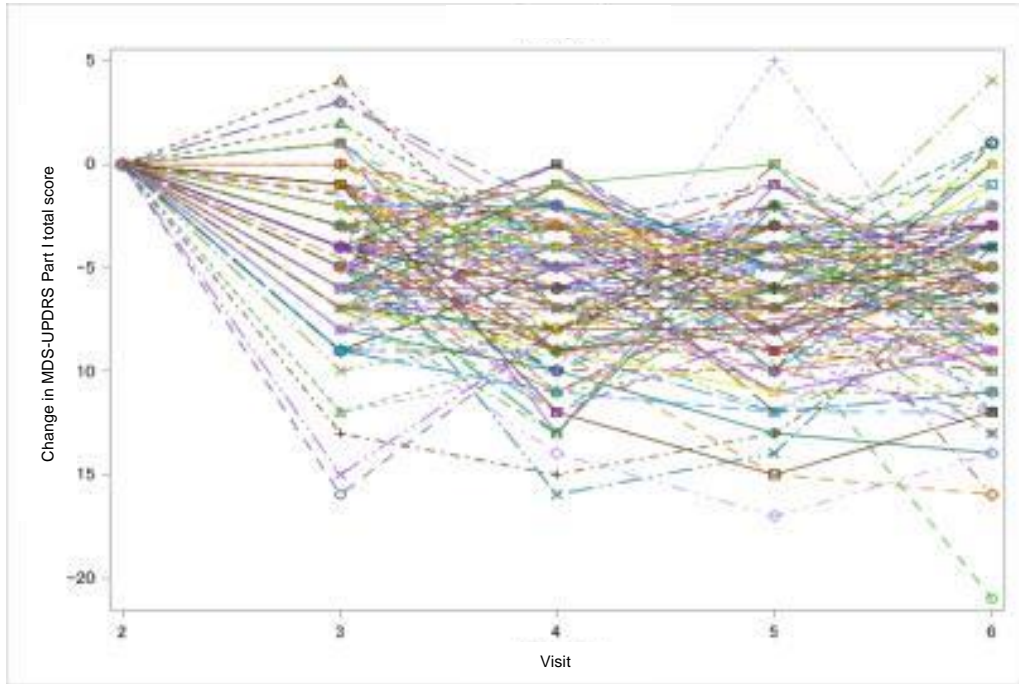

NMS, non-motor symptoms

# Supplementary Figure S3.

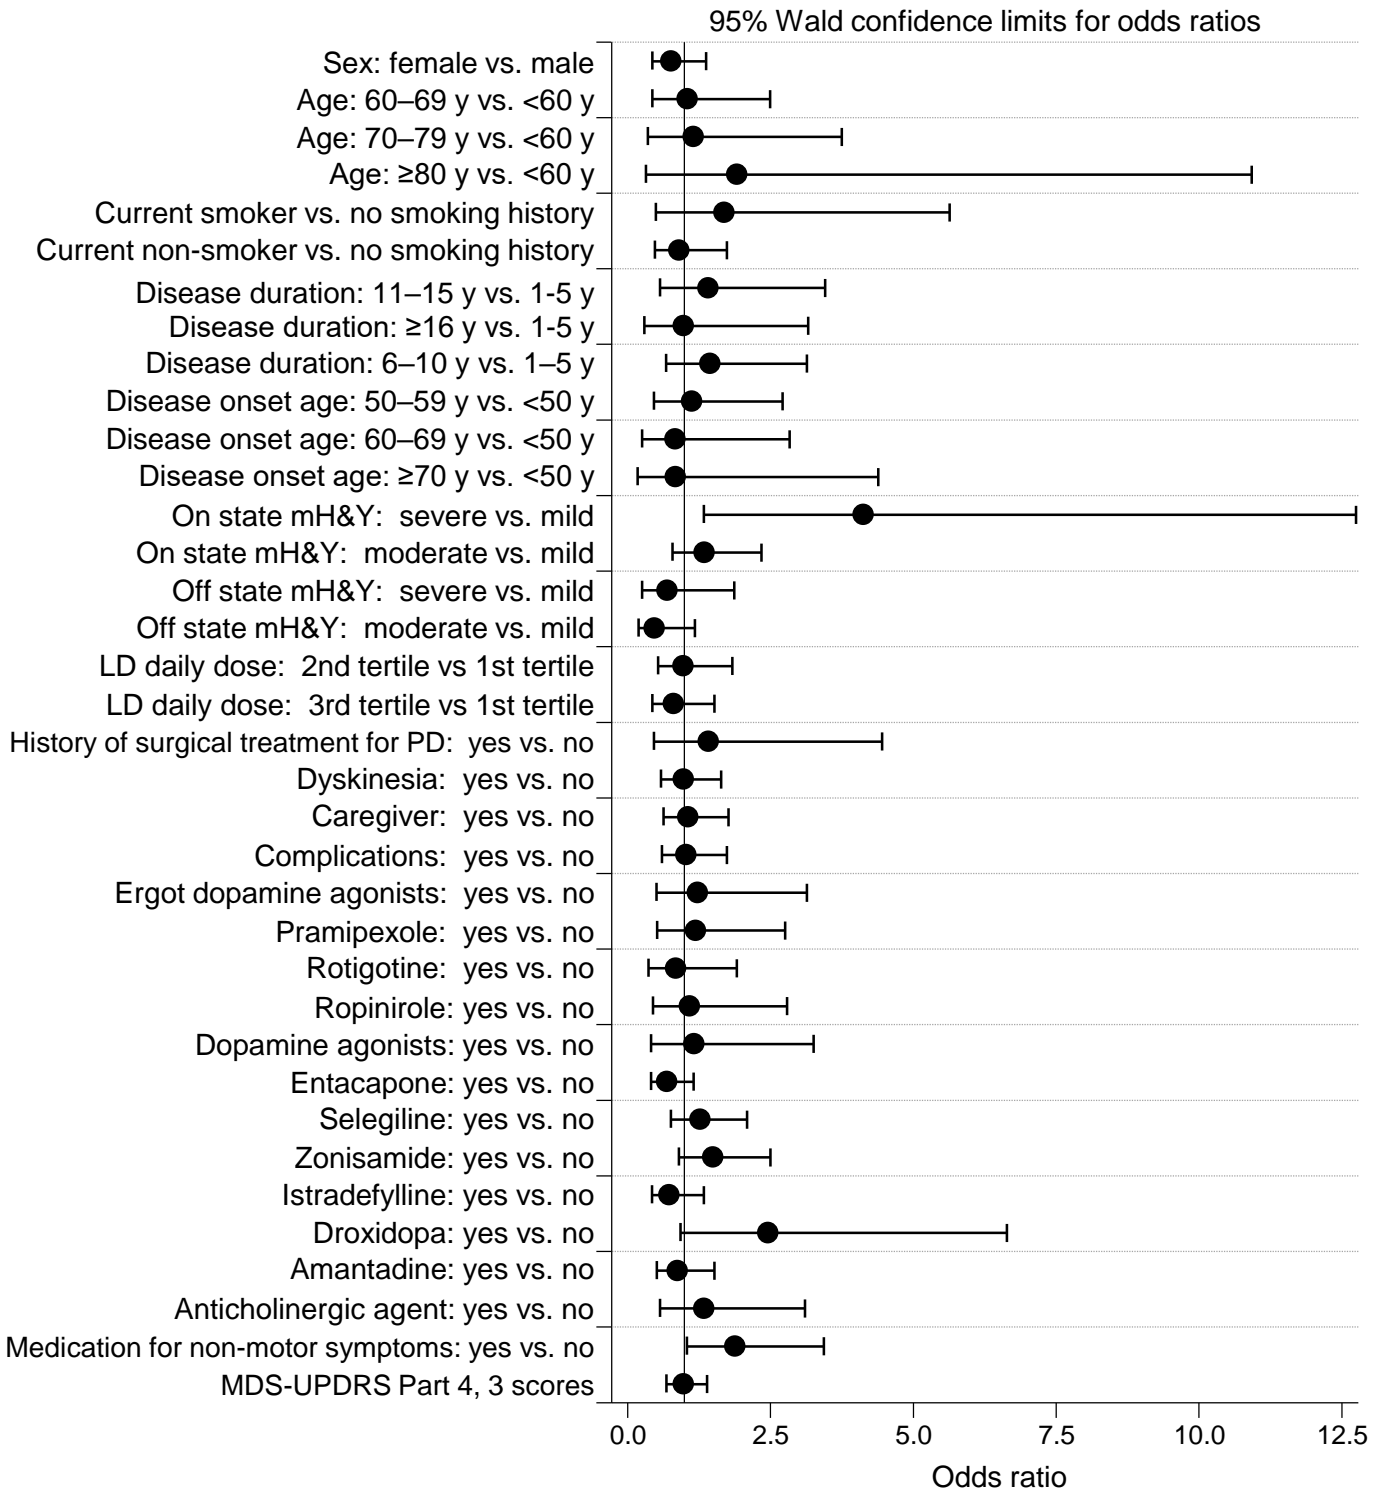

LD, levodopa-containing drug; MDS-UPDRS, Movement Disorder Society Unified Parkinson's Disease Rating Scale; mH&Y, modified Hoehn and Yahr scale; PD, Parkinson's disease
